# Supplementary material for: The architecture of neoplastic follicles in follicular lymphoma; analysis of the relationship between the tumor and follicular helper T cells
Source: PubMed Central journal article supplement — Haematologica. 2019 Sep 19;105(6):1593–603. doi: 10.3324/haematol.2019.220160 (PMC7271595; doi:10.3324/haematol.2019.220160), 2020-06
Supplement: 2019_220160-Disclosures_and_Contributions.pdf [file 2019_220160-Disclosures_and_Contributions.pdf]

Haematologica  
HAEMATOL/2019/220160  
Version 4

The architecture of neoplastic follicles in follicular lymphoma; analysis of the relationship between the tumor and follicular helper T-cells.

William Townsend, Marta Pasikowska, Deborah Yallop, Elizabeth H. Phillips, Piers E.M. Patten, Jonathan R. Salisbury, Robert Marcus, Andrea Pepper, and Stephen Devereux

Disclosures: This research was funded by grants from the charitable organisations: 1. British Society of Haematology in partnership with the Roger Counter Foundation 2. Bloodwise. Information on support received for work outside the submitted work: SD discloses consultancy fees and honoraria from Gilead. WT discloses consultancy fees and honoraria from Roche and Gilead. RM discloses consultancy fees and honoraria from Roche. PP discloses consultancy fees and honoraria Abbvie, Gilead, Janssen and Roche. DY discloses honoraria from Pfizer PP discloses research grants from Roche and Gilead BP discloses research grant from Roche

Contributions: WT, AP, and SD conceived the research, analyzed data and prepared the manuscript. WT conducted most experimental work. JS DY PP and RM provided specimens, clinical correlation and assisted in the preparation of the manuscript and helped develop and refine the experimental and analytical techniques. MP assisted in interpreting and analyzing the TCR repertoire. EP performed additional staining and microscopy. All authors contributed to and agreed the final manuscript.
